# Supplementary material for: Black bean husk and black rice anthocyanin extracts modulated gut microbiota and serum metabolites for improvement in type 2 diabetic rats
Source: Royal Society of Chemistry journal article supplement (doi:10.1039/d2fo01165d), 2022-01-01
Supplement: d2fo01165d1.pdf [file d2fo01165d1.pdf]

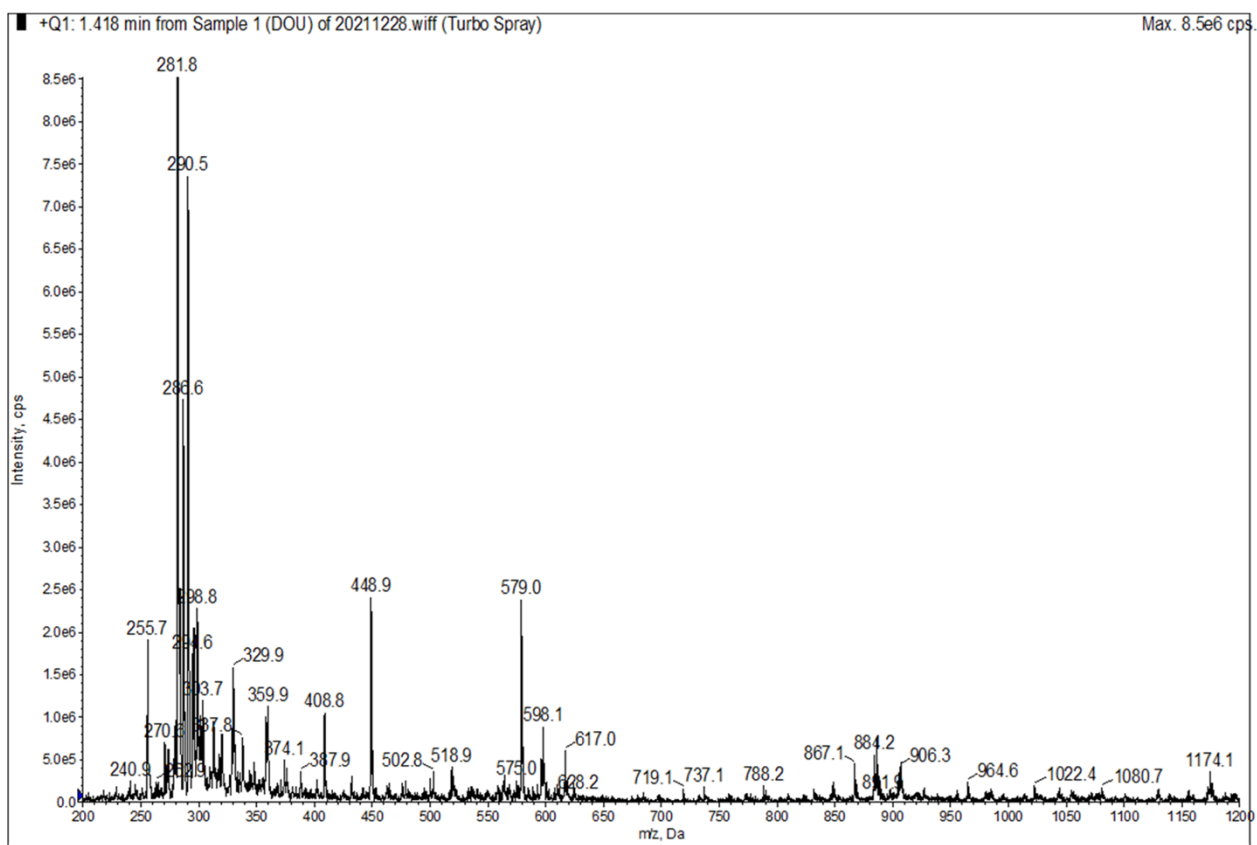

**Figure S1. HPLC-MS total ion flow chromatogram of black bean husk**

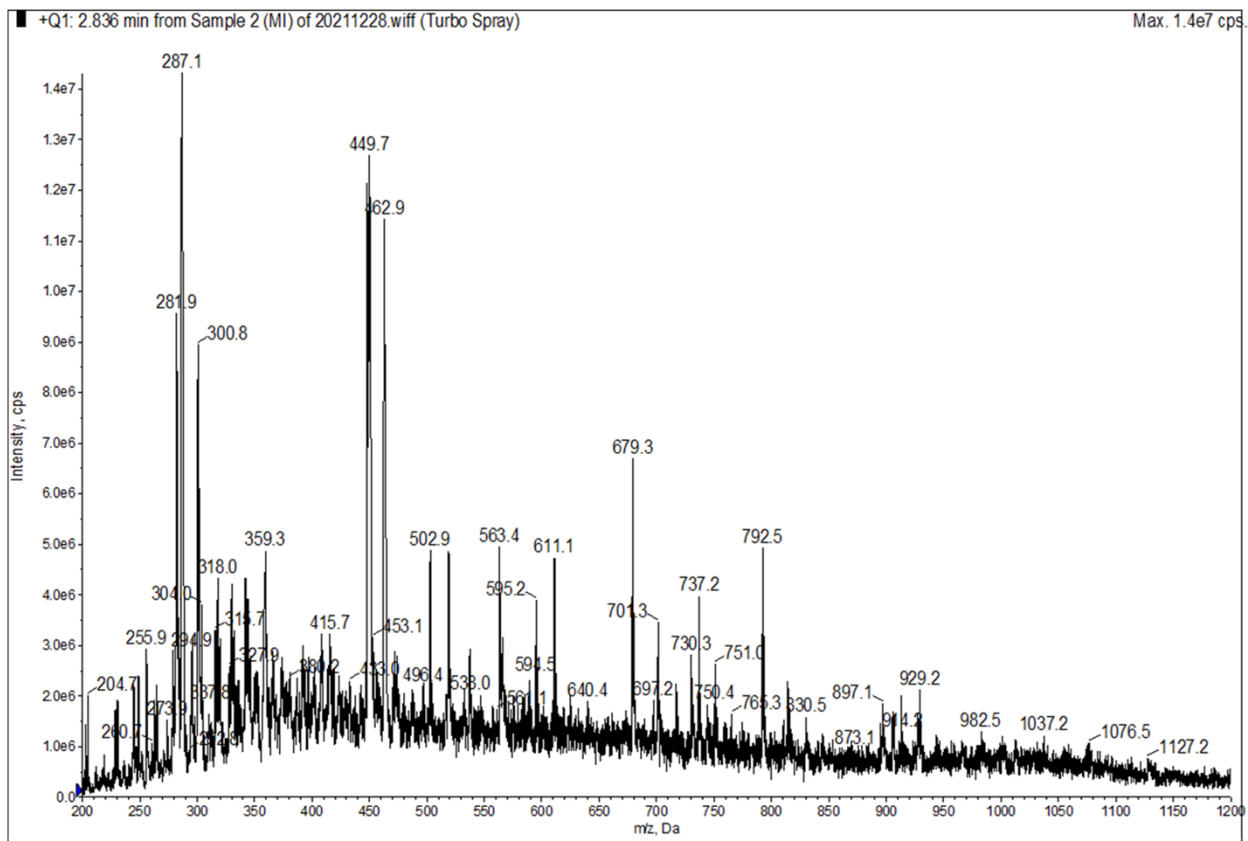

**Figure S2. HPLC-MS total ion flow chromatogram of black rice.**

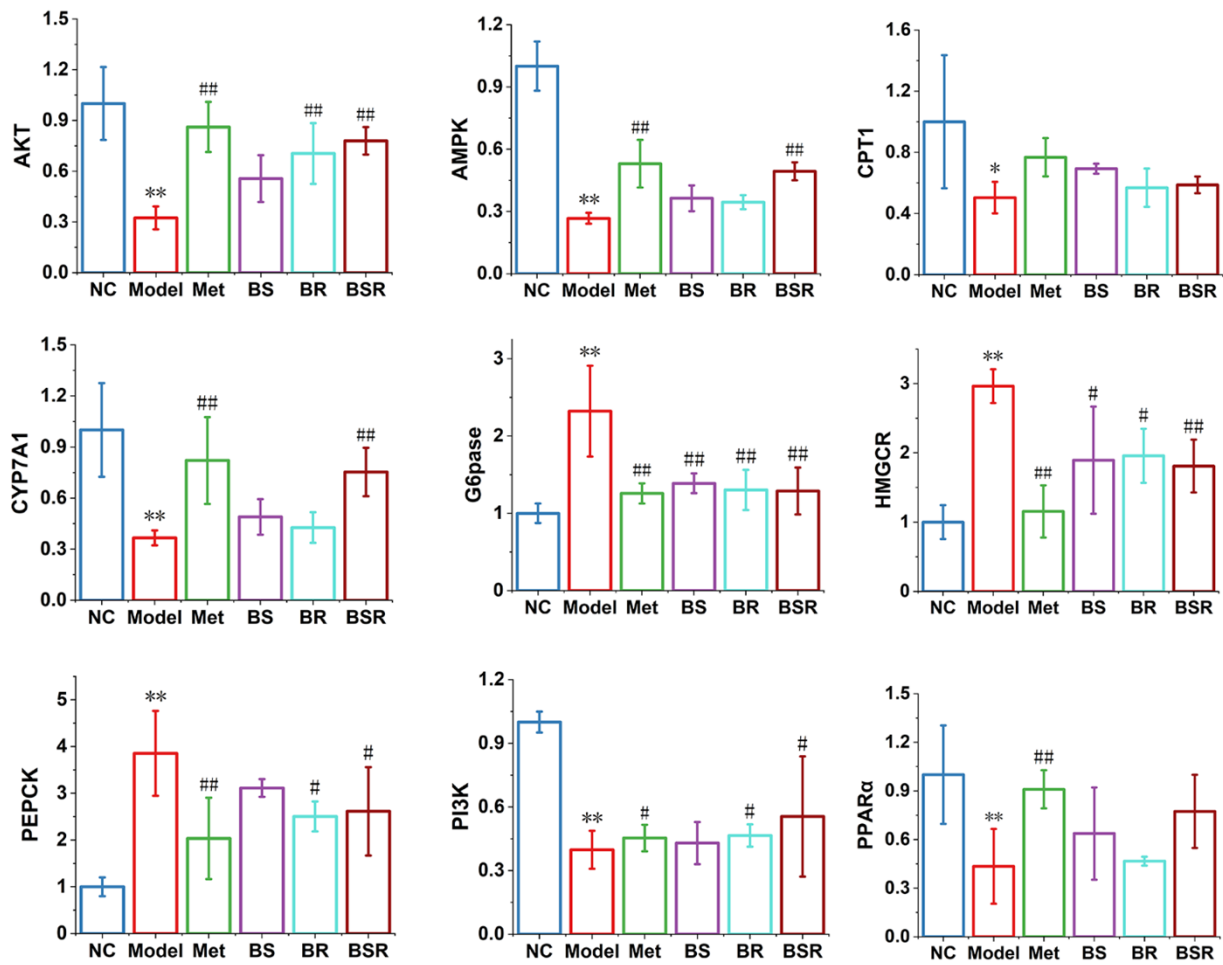

**Figure S3. Effect of black bean husk and black rice anthocyanin extracts on mRNA related to blood glucose regulation.** The expression of relative mRNA, followed by AKT, AMPK, CPT1, CYP7A1, G6pase, HMGCR, PEPCK, PI3K, PPAR $\alpha$ . Data expressed as mean  $\pm$  SD. \* $p$  < 0.05 and \*\* $p$  < 0.01 vs NC group. # $p$  < 0.05 and ## $p$  < 0.01 vs Model group.

TableS1 Differences of serum metabolites in rats.

| No. | Metabolites                                            | m/z    | rt(s)  | VIP<br>(Model vs<br>NC) | p-value<br>(Model vs<br>NC) | VIP<br>(BSR vs<br>Model) | p-value<br>(BSR vs<br>Model) |
|-----|--------------------------------------------------------|--------|--------|-------------------------|-----------------------------|--------------------------|------------------------------|
| 1   | NG, NG-dimethyl-L-arginine (ADMA)                      | 203.15 | 300.94 | 2.96                    | ↑***                        | 1.38                     | ↓*                           |
| 2   | 3-methylcytidine                                       | 258.11 | 234.50 | 1.39                    | ↓***                        | 1.20                     | ↑**                          |
| 3   | (3-Carboxypropyl) trimethylammonium cation             | 146.12 | 382.15 | 2.17                    | ↓***                        | 2.11                     | ↑**                          |
| 4   | Deoxycytidine                                          | 228.10 | 213.86 | 4.34                    | ↓***                        | 3.28                     | ↑*                           |
| 5   | Urea                                                   | 61.04  | 105.90 | 2.20                    | ↑***                        | 1.78                     | ↓***                         |
| 6   | 1-Palmitoyllysophosphatidylcholine                     | 538.38 | 191.48 | 3.09                    | ↓***                        | 1.15                     | ↓*                           |
| 7   | L-Citrulline                                           | 176.10 | 409.34 | 1.92                    | ↑***                        | 1.57                     | ↓***                         |
| 8   | Pantothenate                                           | 220.12 | 283.78 | 1.33                    | ↑***                        | 1.05                     | ↓**                          |
| 9   | Stearyl carnitine                                      | 428.37 | 172.76 | 3.67                    | ↑***                        | 3.02                     | ↓**                          |
| 10  | Bilirubin                                              | 585.27 | 66.93  | 2.34                    | ↓***                        | 3.79                     | ↑***                         |
| 11  | (R)- (+)-Citronellic acid                              | 231.16 | 58.31  | 1.02                    | ↑***                        | 2.33                     | ↑***                         |
| 12  | 1-Stearoyl-2-hydroxy-sn-glycero-3-phosphoethanolamine  | 482.33 | 200.03 | 4.82                    | ↑***                        | 5.02                     | ↓**                          |
| 13  | Arachidonic Acid (peroxide free)                       | 327.23 | 55.72  | 1.51                    | ↓***                        | 1.17                     | ↓**                          |
| 14  | Cholic acid                                            | 373.27 | 230.54 | 6.46                    | ↑**                         | 5.76                     | ↓*                           |
| 15  | Corticosterone                                         | 347.22 | 47.86  | 1.01                    | ↓**                         | 1.90                     | ↑***                         |
| 16  | 1-Palmitoyl-2-hydroxy-sn-glycero-3-phosphoethanolamine | 454.29 | 204.18 | 2.07                    | ↑**                         | 2.66                     | ↓*                           |
| 17  | Thioetheramide-PC                                      | 758.57 | 60.68  | 8.48                    | ↑*                          | 2.05                     | ↓*                           |
| 18  | Trigonelline                                           | 138.05 | 296.57 | 1.80                    | ↑*                          | 2.40                     | ↓**                          |
| 19  | Trimethylamine N-oxide                                 | 76.08  | 335.56 | 1.79                    | ↑*                          | 2.05                     | ↓*                           |
| 20  | 2-Hydroxy-3-methylbutyric acid                         | 117.06 | 166.90 | 1.76                    | ↑***                        | 1.71                     | ↓***                         |
| 21  | Pentobarbital                                          | 225.12 | 40.32  | 11.11                   | ↑***                        | 16.14                    | ↑*                           |
| 22  | D-Allose                                               | 179.06 | 286.44 | 1.93                    | ↑***                        | 1.80                     | ↓**                          |
| 23  | Hydroxyisocaproic acid                                 | 131.07 | 150.55 | 2.33                    | ↑***                        | 3.10                     | ↓**                          |
| 24  | D (-)-beta-hydroxy butyric acid                        | 103.04 | 244.87 | 3.87                    | ↑**                         | 4.32                     | ↓*                           |
| 25  | 3-Hydroxycaproic acid                                  | 187.13 | 106.99 | 2.26                    | ↓**                         | 2.56                     | ↑*                           |
| 26  | Pseudouridine                                          | 243.06 | 250.84 | 1.38                    | ↑**                         | 1.91                     | ↓**                          |
| 27  | Deoxycholic acid                                       | 391.29 | 136.78 | 3.15                    | ↑**                         | 3.36                     | ↓*                           |
| 28  | Bisindolylmaleimide I                                  | 411.19 | 33.36  | 1.25                    | ↑*                          | 1.69                     | ↓*                           |

\*:  $p < 0.05$ ; \*\*:  $p < 0.01$ ; \*\*\*:  $p < 0.001$ ; ↑: up-regulated; ↓: down-regulated.
